# Supplementary material
Source: PubMed Central journal article supplement (PMC5411143)
Supplement: supp_pp.16.00214_PP2016-01938DR1_Supplemental_Figure_S1.pdf [file supp_pp.16.00214_PP2016-01938DR1_Supplemental_Figure_S1.pdf]

Supplementary Fig. S1 Maximum-likelihood phylogenetic tree of GH1-containing proteins from selected plants.

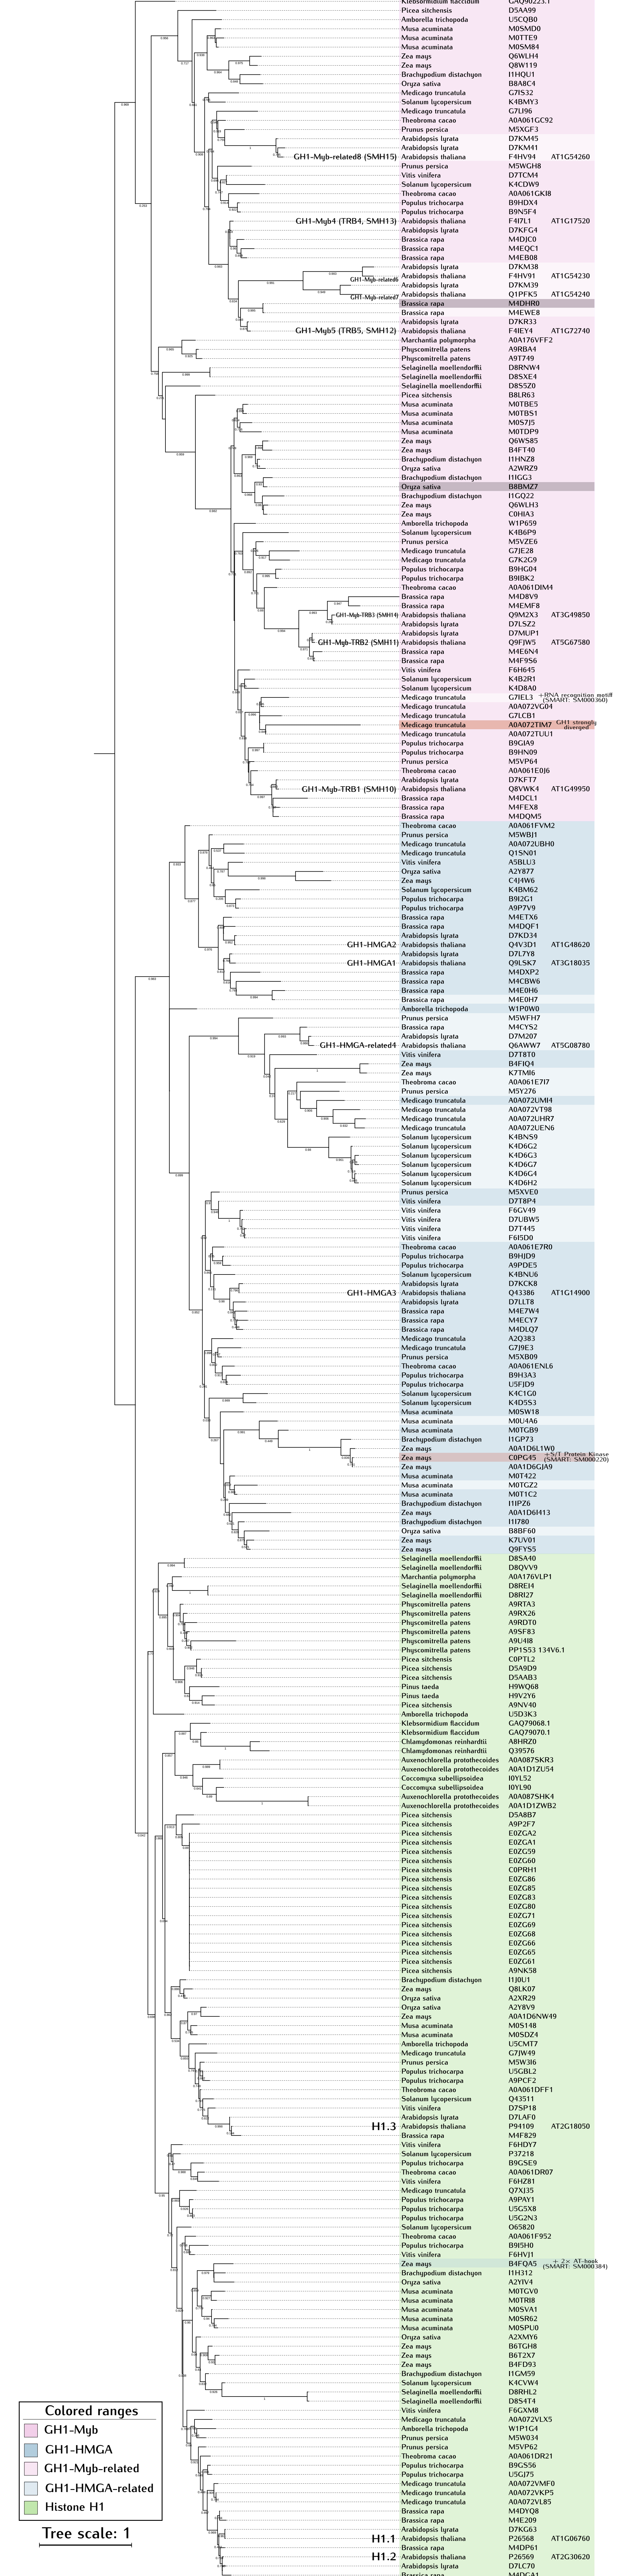

**Colored ranges**

- GH1-Myb
- GH1-HMGA
- GH1-Myb-related
- GH1-HMGA-related
- Histone H1

**Tree scale: 1**

**H1.1**

**H1.2**
