# Supplementary material
Source: PubMed Central journal article supplement (PMC5411143)

Supplementary Fig. S2. Moving sum plot of net charge for N- and C- terminal domains of all Arabidopsis GH1-containing proteins. The net charge (y-axis) is summed in a 20-aa sliding window, with the position along the N- and C-terminal domains, with respect to GH1, denoted on the x-axis. For each N- and C-terminus, the percentages of both positively (K, R) and negatively (D, E) charged residues, total charge and theoretical isoelectric point (pI, calculated with [http://web.expasy.org/compute\\_pi](http://web.expasy.org/compute_pi)) are also shown.

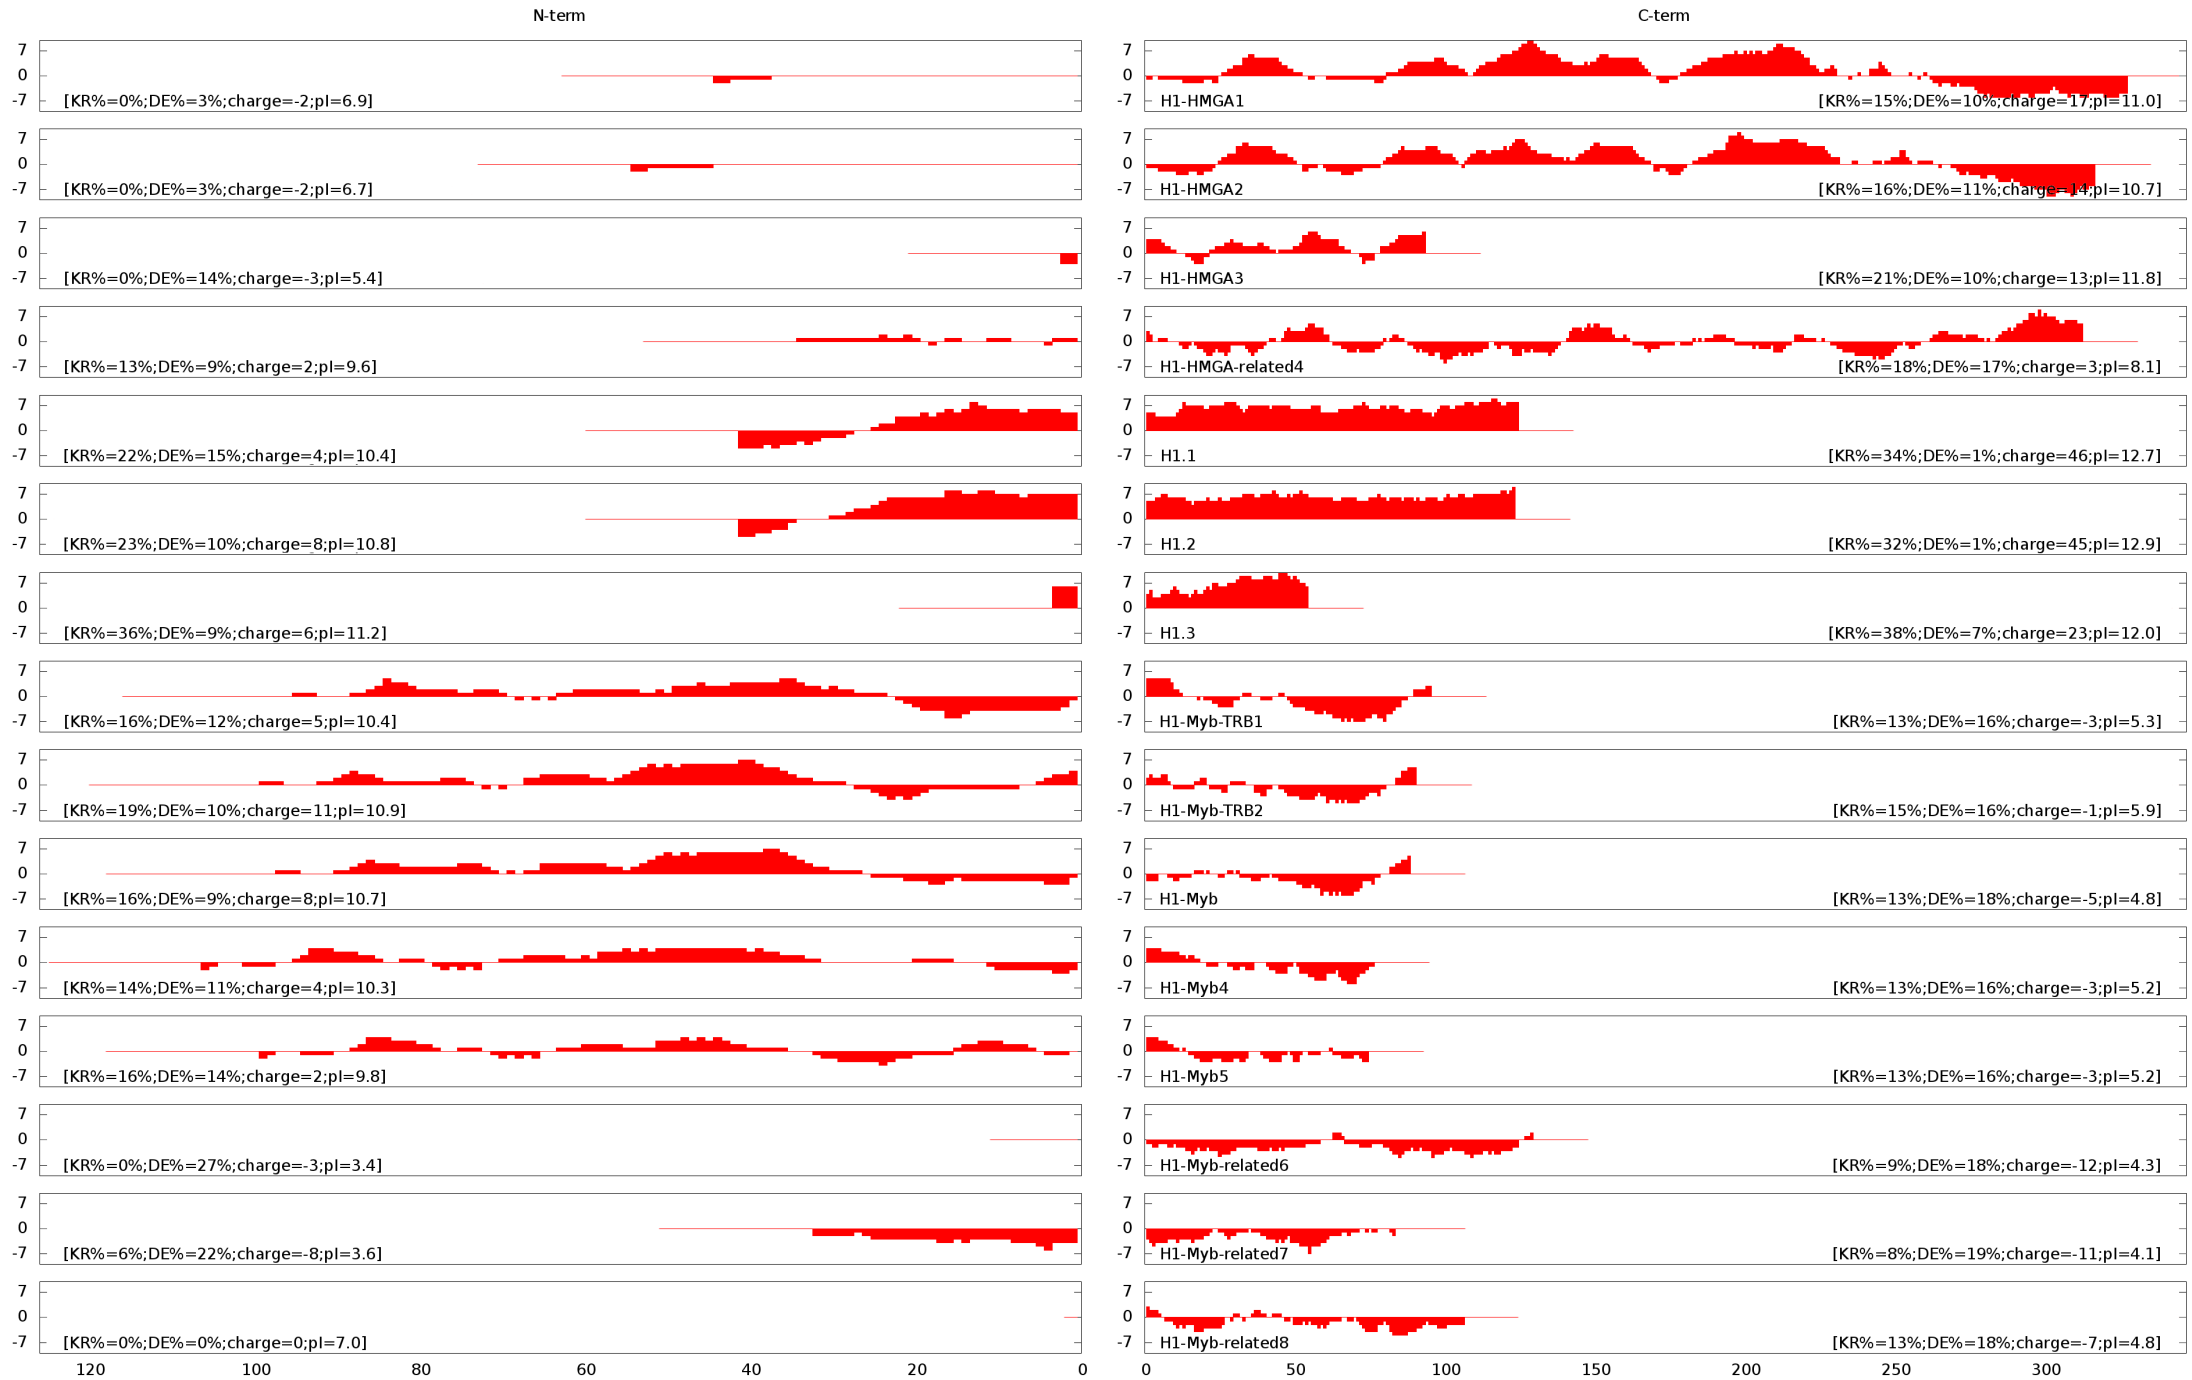

Supplement: supp_pp.16.00214_PP2016-01938DR1_Supplemental_Figure_S2.pdf [file supp_pp.16.00214_PP2016-01938DR1_Supplemental_Figure_S2.pdf]
