# Supplementary material
Source: PubMed Central journal article supplement (PMC5411143)

Supplementary Fig. S3. Relative expression levels of GH1-containing protein coding genes in Arabidopsis, across 74 tissue- or cell-specific microarrays (as used in Schmidt et al., 2011). The arrangement of genes and samples is based on euclidean distance and hierarchical agglomerative clustering. Colors are scaled per row. Red and green ranges correspond to high and low expression levels, respectively. The pictograms indicate the cell and tissue types.

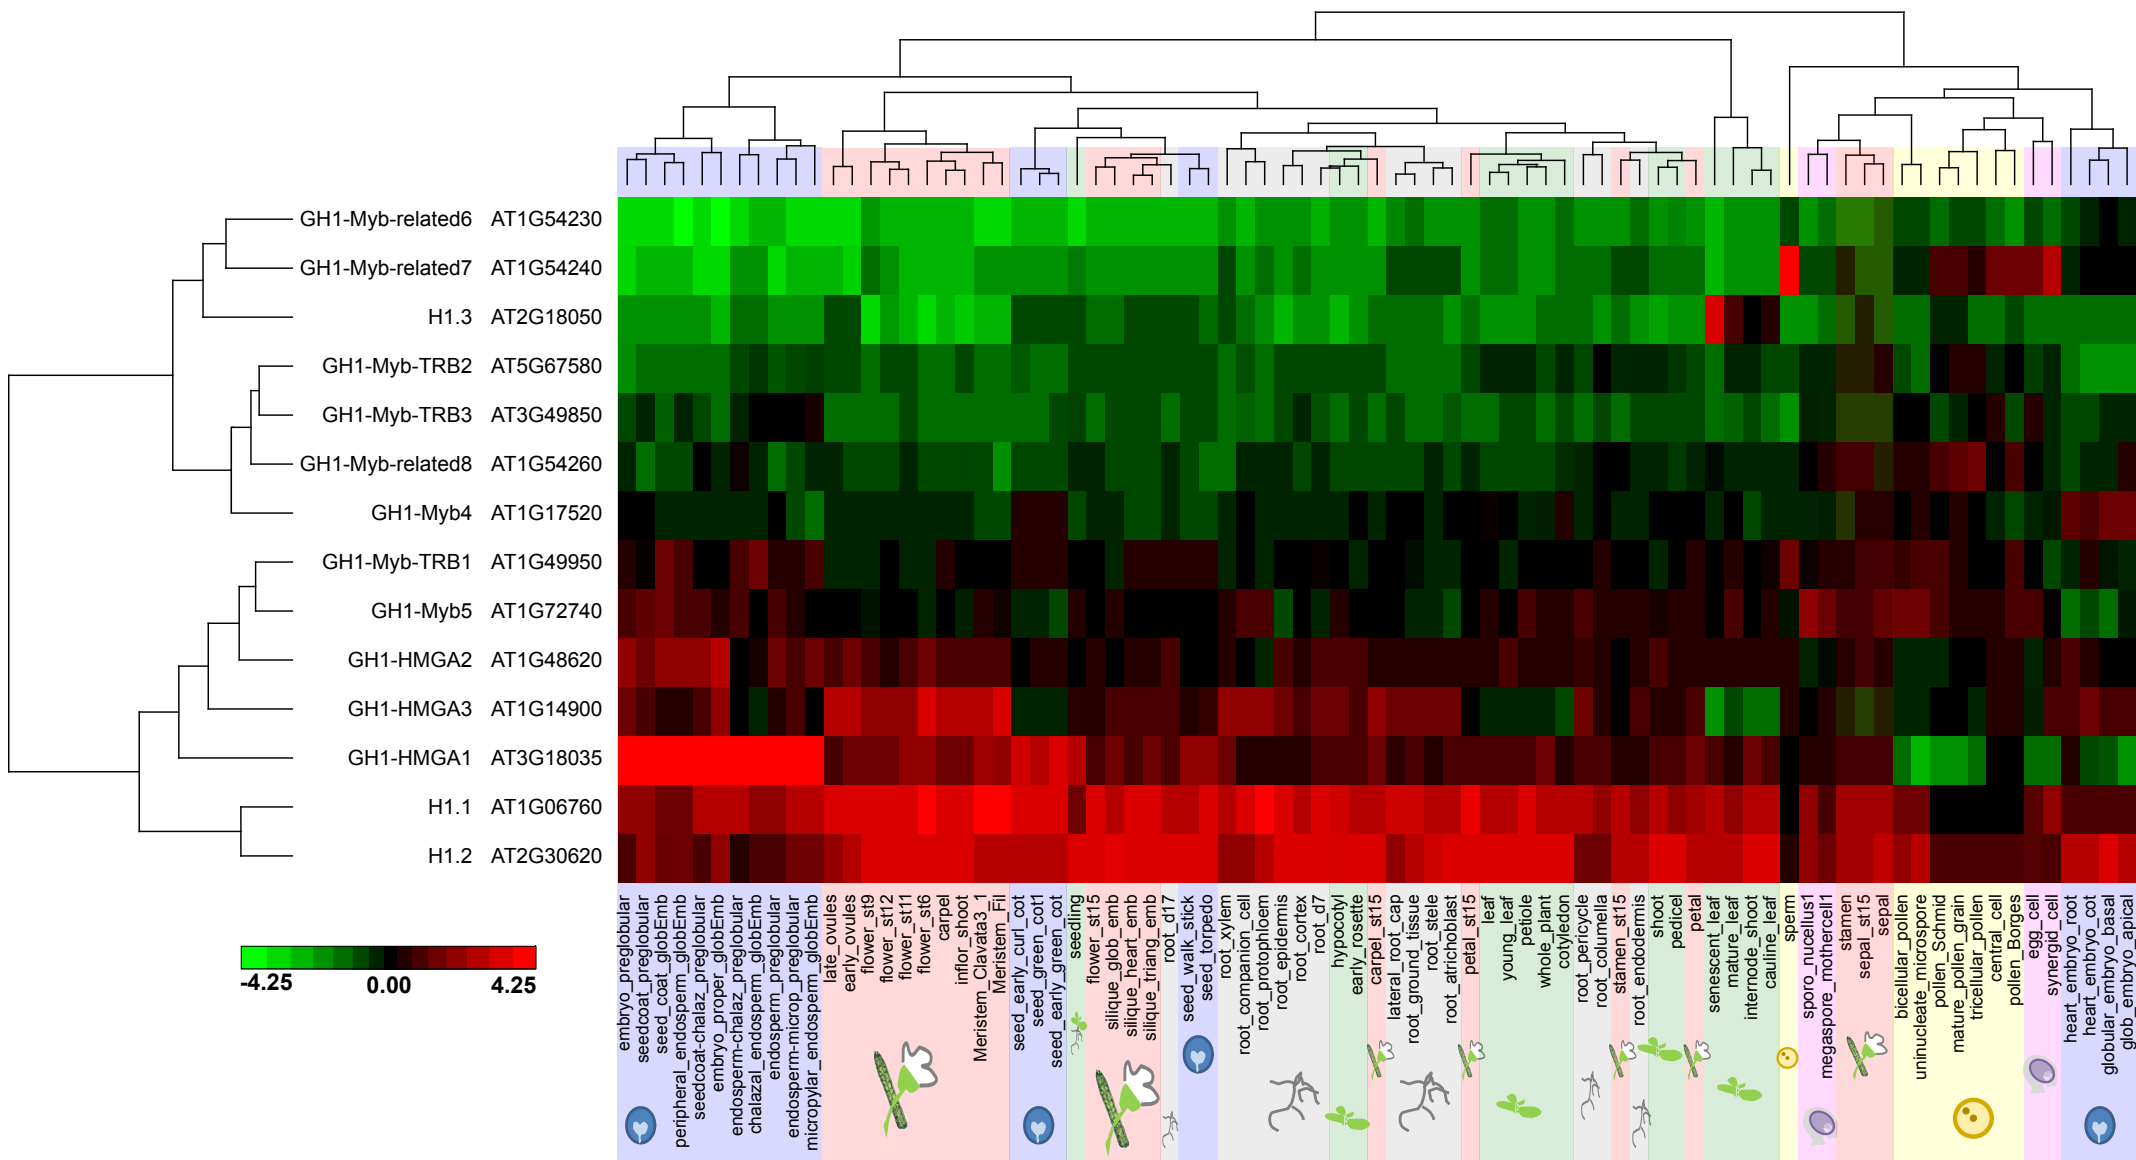

Supplement: supp_pp.16.00214_PP2016-01938DR1_Supplemental_Figure_S3.pdf [file supp_pp.16.00214_PP2016-01938DR1_Supplemental_Figure_S3.pdf]
