# Supplementary material
Source: PubMed Central journal article supplement (PMC5411143)
Supplement: supp_pp.16.00214_PP2016-01938DR1_Supplemental_Table_S1.pdf [file supp_pp.16.00214_PP2016-01938DR1_Supplemental_Table_S1.pdf]

Supplementary Table S1. Accession numbers and descriptions of Arabidopsis thaliana proteins containing a GH1 domain from different databases (TAIR10, UniProt, NCBI and ChromDB\*). This table is supplemented with data concerning the occurrence, rank and scores of proteins identified in the nuclear proteome of Arabidopsis T-87 suspension culture cells (6753 proteins identified in total, www.proteome.arabidopsis.pl) and localization of gene expression according to the BAR Toronto database (Fucile et al., 2011) (http://bar.utoronto.ca/). \*a copy of this discontinued database in the web archive was used.

|    | Symbol                      | TAIR             |                                                                     | Uniprot |                                                                                                                     | len<br>gth | NCBI                                                                                                                                                                                                                                                                                             |                                                                                                                                          | ChromDB | Nuclear proteome |       |          | BAR Toronto                                                 |
|----|-----------------------------|------------------|---------------------------------------------------------------------|---------|---------------------------------------------------------------------------------------------------------------------|------------|--------------------------------------------------------------------------------------------------------------------------------------------------------------------------------------------------------------------------------------------------------------------------------------------------|------------------------------------------------------------------------------------------------------------------------------------------|---------|------------------|-------|----------|-------------------------------------------------------------|
|    |                             | AGI / locus      | Description                                                         | ID      | Description                                                                                                         |            | ID                                                                                                                                                                                                                                                                                               | Description                                                                                                                              |         | rank             | score | presence |                                                             |
| 1  | <b>GH1-HMGA1</b>            | AT3G18035.1      | HON4   winged-helix DNA-binding transcription factor family protein | Q9LSK7  | HON4 At3g18035                                                                                                      | 480        | ref NP_188431.3<br>dbj BAB01332.1<br>gb AAO00794.1<br>gb AAP31950.1<br>gb AEE76037.1                                                                                                                                                                                                             | HON4; unnamed protein product; linker histone protein, putative; At3g18035; winged-helix DNA-binding transcription factor family protein | -       | 1458             | 843   | +        | most tissues, not pollen                                    |
| 2  | <b>GH1-HMGA2</b>            | AT1G48620.1      | HON5   high mobility group A5                                       | Q4V3D1  | HON5 At1g48620                                                                                                      | 479        | ref NP_175295.1<br>gb AAY56416.1<br>gb ABF57274.1<br>gb AEE32328.1                                                                                                                                                                                                                               | At1g48620; high mobility group A5                                                                                                        | HMGA2   | 1017             | 963   | +        | apical meristem, most other tissues                         |
| 3  |                             | <i>AT1G48620</i> |                                                                     | Q9LP61  | T1N15.25                                                                                                            | 594        | gb AAF79708.1 AC020889_16                                                                                                                                                                                                                                                                        | T1N15.25                                                                                                                                 |         |                  |       | +        |                                                             |
| 4  |                             | <i>AT1G48620</i> |                                                                     | Q9C6X5  | Putative uncharacterized protein F9P7.3                                                                             | 332        | gb AAG50847.1 AC074308_3                                                                                                                                                                                                                                                                         | hypothetical protein, 3' partial                                                                                                         |         |                  |       | +        |                                                             |
| 5  | <b>GH1-HMGA3</b>            | AT1G14900.1      | HMGA   high mobility group A                                        | Q43386  | HMG-Y-related protein A   At1g14900,F10B6.31                                                                        | 204        | ref NP_172943.1<br>sp Q43386.1 HMGYA_ARATH<br>gb AAF79232.1 AC006917_17<br>emb CAA67564.1<br>gb AAB97739.1<br>gb AAO44072.1<br>dbj BAH19921.1<br>gb AEE29240.1<br>emb CAA71797.1<br>(one mismatch)                                                                                               | high mobility group protein A; F10B6.31; HMG-Y-related protein A; HMG-I/Y protein                                                        | HMGA3   | 3144             | 122   | +        | apical meristem, most other tissues, phloem companion cells |
| 6  | <b>GH1-HMGA-related4</b>    | AT5G08780.1      | winged-helix DNA-binding transcription factor family protein        | Q6AWW7  | At5g08780                                                                                                           | 457        | ref NP_680160.2<br>gb AAT85727.1<br>gb AAU94419.1<br>gb AED91349.1                                                                                                                                                                                                                               | winged-helix DNA-binding transcription factor family protein; At5g08780                                                                  | HMGA4   | -                | -     | -        | no data                                                     |
| 7  |                             | <i>AT5G08780</i> |                                                                     | Q9C599  | Putative uncharacterized protein At5g08780                                                                          | 463        | emb CAC35883.1                                                                                                                                                                                                                                                                                   | putative protein                                                                                                                         |         |                  |       |          |                                                             |
| 8  | <b>GH1-Myb-TRB1 (SMH10)</b> | AT1G49950.1      | TRB1, ATTRB1   telomere repeat binding factor 1                     | Q8VWK4  | Telomere repeat-binding factor 1   TRB1 At1g49950,F2J10.16 (Identical sequences of proteins in all splice variants) | 300        | ref NP_564559.1<br>ref NP_849789.1<br>ref NP_973998.1<br>sp Q8VWK4.1 TRB1_ARATH<br>gb AAL73123.1 U83623_1<br>gb AAL32814.1<br>gb AAP80178.1<br>gb AAS10009.1<br>gb AEE32497.1<br>gb AEE32498.1<br>gb AEE32499.1<br>gb AAL73438.1 U83624_1<br>(one mismatch)<br>gb AAM65540.1<br>(two mismatches) | telomere repeat binding factor 1; MYB transcription factor; Unknown protein; At1g49950; DNA-binding protein PcMYB1, putative             | SHM10   | 688              | 3025  | +        | mature pollen, most other tissues                           |
| 9  |                             | AT1G49950.2      | TRB1, ATTRB1   telomere repeat binding factor 1                     |         |                                                                                                                     |            |                                                                                                                                                                                                                                                                                                  |                                                                                                                                          |         |                  |       |          |                                                             |
| 10 |                             | AT1G49950.3      | TRB1, ATTRB1   telomere repeat binding factor 1                     |         |                                                                                                                     |            |                                                                                                                                                                                                                                                                                                  |                                                                                                                                          |         |                  |       |          |                                                             |
| 11 |                             | <i>AT1G49950</i> |                                                                     |         |                                                                                                                     |            |                                                                                                                                                                                                                                                                                                  |                                                                                                                                          |         |                  |       |          |                                                             |

|    |                        |             |                                                                                       |        |                                                                                                   |     |                                                                                                                                                                                                                                        |                                                                                                                                                                  |       |      |     |                                                       |                                         |
|----|------------------------|-------------|---------------------------------------------------------------------------------------|--------|---------------------------------------------------------------------------------------------------|-----|----------------------------------------------------------------------------------------------------------------------------------------------------------------------------------------------------------------------------------------|------------------------------------------------------------------------------------------------------------------------------------------------------------------|-------|------|-----|-------------------------------------------------------|-----------------------------------------|
| 12 | GH1-Myb-TRB2 (SMH11)   | AT5G67580.1 | TRB2, ATTRB2, TBP3, ATTBP3   Homeodomain-like/winged-helix DNA-binding family protein | Q9FJW5 | Telomere repeat-binding factor 2   TRB2 (Identical sequences of proteins in both splice variants) | 299 | ref NP_201559.1<br>ref NP_851286.1<br>sp Q9FJW5.1 TRB2_ARATH<br>gb AAL73442.1 U83836_1<br>dbj BAB08466.1<br>gb AAK63987.1<br>gb AAL76146.1<br>gb AAS10015.1<br>gb AED98362.1<br>gb AED98363.1<br>gb AAL73441.1 U83837_1 (one mismatch) | telomere repeat binding factor 2; MYB transcription factor; Telomere-binding protein 3; unnamed protein product; AT5g67580/K919_15;                              | SMH11 | 4281 | 181 | below threshold, detected in 2 samples only           | most tissues                            |
| 13 |                        | AT5G67580.2 | TRB2, ATTRB2, TBP3, ATTBP3   Homeodomain-like/winged-helix DNA-binding family protein |        |                                                                                                   |     |                                                                                                                                                                                                                                        |                                                                                                                                                                  |       |      |     |                                                       |                                         |
| 14 |                        | AT5G67580   |                                                                                       |        |                                                                                                   |     | G0XQD5                                                                                                                                                                                                                                 |                                                                                                                                                                  |       |      |     |                                                       |                                         |
| 15 | GH1-Myb-TRB3 (SMH14)   | AT3G49850.1 | TRB3, ATTRB3, TBP2   telomere repeat binding factor 3                                 | Q9M2X3 | Telomere repeat-binding factor 3   TRB3 TBP2,At3g49850,T16K5.200                                  | 295 | ref NP_190554.1<br>sp Q9M2X3.1 TRB3_ARATH<br>gb AAL73439.1 U83839_1<br>gb AAL73440.1 U83838_1<br>emb CAB66923.1 <br>gb AAL24273.1 <br>gb AAL57702.1 <br>gb AAL79593.1 <br>gb AAS10012.1 <br>gb AEE78598.1                              | telomere repeat binding factor 3; MYB transcription factor; Telomere-binding protein 2; MYB-like protein; AT3g49850/T16K5_200                                    | SMH14 | 5906 | 31  | below threshold, only one peptide detected, low score | most tissues                            |
| 16 | GH1-Myb4 (TRB4, SMH13) | AT1G17520.1 | Homeodomain-like/winged-helix DNA-binding family protein                              | F4I7L1 | Telomere repeat-binding factor 4   At1g17520,F1L3.23                                              | 296 | sp F4I7L1.2 TRB4<br>dbj BAC43136.1<br>gb AAO63354.1<br>gb AAS10008.1<br>ref NP_173195.2  (one mismatch)<br>gb AEE29601.1  (one mismatch)                                                                                               | Telomere repeat-binding factor 4; putative telomere repeat-binding factor 4; MYB transcription factor; putative myb-related DNA-binding protein; At1g1752        | SMH13 | -    | -   | -                                                     | dry seed                                |
| 17 |                        | AT1G17520   |                                                                                       |        |                                                                                                   | 240 | gb AAF79481.1 AC022492_25                                                                                                                                                                                                              | F1L3.23                                                                                                                                                          |       |      |     |                                                       |                                         |
| 18 | GH1-Myb5 (TRB5, SMH12) | AT1G72740.1 | Homeodomain-like/winged-helix DNA-binding family protein                              |        |                                                                                                   | 289 | gb AAG51858.1 AC010926_21                                                                                                                                                                                                              | putative DNA-binding protein; 27830-29933                                                                                                                        | SMH12 | 5374 | 57  | below threshold, only one peptide detected            | mature pollen, most other tissues       |
| 19 |                        | AT1G72740   |                                                                                       | F4IEY4 | Telomere repeat-binding factor 5   At1g72740,F28P22.7                                             | 287 | ref NP_001077814.1<br>gb AEE35367.1                                                                                                                                                                                                    | homeodomain-like/winged-helix DNA-binding protein                                                                                                                |       |      |     |                                                       |                                         |
| 20 |                        | AT1G72740.2 | Homeodomain-like/winged-helix DNA-binding family protein                              | F4IEY3 | Homeodomain-like/winged-helix DNA-binding protein                                                 | 281 | ref NP_177418.2<br>sp F4IEY4.1 TRB5_ARATH<br>gb AEE35366.1                                                                                                                                                                             | homeodomain-like/winged-helix DNA-binding protein; Telomere repeat-binding factor 5; MYB transcription factor; homeodomain-like/winged-helix DNA-binding protein |       |      |     |                                                       |                                         |
| 21 |                        | AT1G72740   |                                                                                       |        |                                                                                                   | 151 | gb AAK50065.1 AF372925_1<br>gb AAM70558.1                                                                                                                                                                                              | At1g72740/F28P22_7                                                                                                                                               |       |      |     |                                                       |                                         |
| 22 | GH1-Myb-related6       | AT1G54230.1 | Winged helix-turn-helix transcription repressor DNA-binding                           | F4HV91 | Winged helix-turn-helix transcription repressor DNA-binding protein                               | 232 | ref NP_175825.2<br>gb AEE33069.1                                                                                                                                                                                                       | winged helix-turn-helix transcription repressor DNA-binding protein                                                                                              | -     | -    | -   | -                                                     | flower buds, mature pollen, cotyledones |
| 23 |                        | AT1G54230   |                                                                                       | Q9SLK9 | Putative uncharacterized protein F20D21.5                                                         | 276 | gb AAD25603.1 AC005287_5                                                                                                                                                                                                               | Hypothetical protein                                                                                                                                             |       |      |     |                                                       |                                         |

|    |                          |             |                                                              |        |                                                              |     |                                                   |                                                                                                  |       |   |   |   |                                                                                                                                                                    |
|----|--------------------------|-------------|--------------------------------------------------------------|--------|--------------------------------------------------------------|-----|---------------------------------------------------|--------------------------------------------------------------------------------------------------|-------|---|---|---|--------------------------------------------------------------------------------------------------------------------------------------------------------------------|
| 24 | GH1-Myb-related7         | AT1G54240.1 | winged-helix DNA-binding transcription factor family protein | Q1PFK5 | Winged-helix DNA-binding transcription factor family protein | 229 | ref NP_175826.2<br>gb ABE65711.1<br>gb AEE33070.1 | winged-helix DNA-binding transcription factor family protein;<br>hypothetical protein At1g54240; | -     | - | - | - | mature pollen grain, pollen tubes, cotyledones of heart stage embryo, weak induction by osmotic and heat stress, weak expression in guard cells and aba1 hypocotyl |
| 25 |                          | AT1G54240   |                                                              | A0MEC6 | Putative uncharacterized protein                             | 230 | gb ABK28439.1                                     | unknown                                                                                          |       |   |   |   |                                                                                                                                                                    |
| 26 |                          | AT1G54240   |                                                              | Q9SLK8 | Putative uncharacterized protein F20D21.6                    | 207 | gb AAD25606.1 AC005287_8                          | Hypothetical protein                                                                             |       |   |   |   |                                                                                                                                                                    |
| 27 | GH1-Myb-related8 (SMH15) | AT1G54260.1 | winged-helix DNA-binding transcription factor family protein | F4HV94 | Winged-helix DNA-binding transcription factor family protein | 197 | ref NP_175828.1 <br>gb AEE33072.1                 | winged-helix DNA-binding transcription factor family protein                                     | SMH15 | - | - | - | mature pollen                                                                                                                                                      |
| 28 |                          | AT1G54260   |                                                              | Q67YM4 | Putative uncharacterized protein At1g54260                   | 169 | dbj BAD44207.1                                    | hypothetical protein                                                                             |       |   |   |   |                                                                                                                                                                    |
| 29 |                          | AT1G54260   |                                                              | Q9SLK7 | Putative uncharacterized protein F20D21.8                    | 227 | gb AAD25607.1 AC005287_9                          | Hypothetical protein                                                                             |       |   |   |   |                                                                                                                                                                    |
